# Supplementary material for: Genomic Features of the Human Dopamine Transporter Gene and Its Potential Epigenetic States: Implications for Phenotypic Diversity
Source: PubMed Central journal article supplement (PMC2883569; doi:10.1371/journal.pone.0011067), 2010-06-10
Supplement: pone.0011067.s007.pdf [file pone.0011067.s007.pdf]

*Table S 1 - SNPs in the SLC6A3 gene*

| <b>SNP base<br/>(NCBI)</b> | <b>SNP rs ID</b> | <b>Alleles</b>                               | <b>Minor<br/>Allele</b> | <b>Minor-Allele<br/>Frequency (%)</b> | <b>Heterozygosity</b> | <b>Location</b> | <b>Conservation<br/>Score</b> |
|----------------------------|------------------|----------------------------------------------|-------------------------|---------------------------------------|-----------------------|-----------------|-------------------------------|
| 1445965                    | rs7732456        | C/ A                                         | C                       | 2                                     | 0.04                  | utr-3(dbSNP)    | 0                             |
| 1446026                    | rs28363175       | A/ G                                         | A                       | 1                                     | 0.01                  | utr-3(dbSNP)    | 0.005                         |
| 1446038                    | rs28363174       | A/ G                                         | A                       | 2                                     | 0.05                  | utr-3(dbSNP)    | 0.003                         |
| 1446041                    | rs28363173       | G/ C                                         | G                       | 1                                     | 0.01                  | utr-3(dbSNP)    | 0.003                         |
| 1446063                    | rs1809939        | G/ A                                         | G                       | 17                                    | 0.29                  | utr-3(dbSNP)    | 0.001                         |
| 1446344                    | rs3797200        | T/ C                                         | T                       | 16                                    | 0.28                  | utr-3(dbSNP)    | 0                             |
| 1446454                    | rs16877691       | G/ A                                         | G                       | 1                                     | 0.03                  | utr-3(dbSNP)    | 0.002                         |
| 1446494                    | rs28363172       | C/ T                                         | C                       | 1                                     | 0.01                  | utr-3(dbSNP)    | 0.002                         |
| 1446511                    | rs28363171       | A/ G                                         | A                       | 1                                     | 0.01                  | utr-3(dbSNP)    | 0                             |
|                            |                  | -/                                           |                         |                                       |                       |                 |                               |
| 1446863                    | rs28363170       | GGGGGCCCTGCATGCGTCCTGG<br>GGTAGTACACGCTCCAGT | -                       | 13                                    | 0.23                  | utr-3(dbSNP)    | 0                             |
| 1447234                    | rs28363169       | T/ C                                         | T                       | 1                                     | 0.02                  | utr-3(dbSNP)    | 0                             |
| 1447389                    | rs28363168       | A/ C                                         | A                       | 3                                     | 0.07                  | utr-3(dbSNP)    | 0.004                         |
| 1447522                    | rs27072          | T/ C                                         | T                       | 20                                    | 0.31                  | utr-3(dbSNP)    | 0                             |
| 1447600                    | rs11564774       | G/ C                                         | G                       | 16                                    | 0.27                  | utr-3(dbSNP)    | 0                             |
| 1447615                    | rs28363167       | T/ C                                         | T                       | 1                                     | 0.01                  | utr-3(dbSNP)    | 0.003                         |
| 1447814                    | rs28363166       | T/ C                                         | T                       | 4                                     | 0.08                  | utr-3(dbSNP)    | 0                             |
| 1447815                    | rs1042098        | G/ A                                         | G                       | 28                                    | 0.4                   | utr-3(dbSNP)    | 0                             |
| 1447938                    | rs28363165       | -/ TGGCTAAGAGCAGCTGAAGG                      | -                       | 1                                     | 0.01                  | intron(dbSNP)   | 0.002                         |
| 1448077                    | rs40184          | T/ C                                         | T                       | 42                                    | 0.49                  | intron(dbSNP)   | 0                             |
| 1448113                    | rs28363164       | T/ C                                         | T                       | 1                                     | 0.01                  | intron(dbSNP)   | 0                             |
| 1448114                    | rs28363163       | A/ G                                         | A                       | 1                                     | 0.01                  | intron(dbSNP)   | 0                             |
| 1448115                    | rs28363162       | T/ C                                         | T                       | 1                                     | 0.01                  | intron(dbSNP)   | 0                             |
| 1448131                    | rs28363161       | A/ G                                         | A                       | 2                                     | 0.04                  | intron(dbSNP)   | 0                             |
| 1448391                    | rs28363160       | A/ C                                         | A                       | 3                                     | 0.05                  | intron(dbSNP)   | 0                             |
| 1449813                    | rs11564773       | C/ T                                         | C                       | 11                                    | 0.19                  | intron(dbSNP)   | 0                             |
| 1451007                    | rs11564772       | T/ C                                         | T                       | 12                                    | 0.22                  | intron(dbSNP)   | 0.001                         |
| 1451797                    | rs11564771       | A/ G                                         | A                       | 13                                    | 0.23                  | intron(dbSNP)   | 0.11                          |
| 1452431                    | rs11564769       | C/ T                                         | C                       | 8                                     | 0.16                  | intron(dbSNP)   | 0                             |
| 1452951                    | rs28363159       | T/ C                                         | T                       | 1                                     | 0.03                  | intron(dbSNP)   | 0                             |

|         |            |                    |           |    |              |                          |       |
|---------|------------|--------------------|-----------|----|--------------|--------------------------|-------|
| 1453192 | rs28363158 | C/ T               | C         | 1  | 0.01         | intron(dbSNP)            | 0     |
| 1453241 | rs28363157 | T/ A/ G            | A         | 1  | multiallelic | intron(dbSNP)            | 0     |
| 1453365 | rs28363156 | T/ C               | T         | 1  | 0.02         | intron(dbSNP)            | 0     |
| 1453368 | rs10155607 | G/ T               | G         | 2  | 0.03         | intron(dbSNP)            | 0     |
| 1453538 | rs28363155 | T/ G               | T         | 1  | 0.02         | intron(dbSNP)            | 0     |
| 1453596 | rs28363154 | G/ T/ C            | T         | 1  | multiallelic | intron(dbSNP)            | 0     |
| 1453685 | rs28363153 | T/ C               | T         | 1  | 0.02         | intron(dbSNP)            | 0     |
| 1453692 | rs28363152 | G/ T               | G         | 1  | 0.02         | intron(dbSNP)            | 0     |
| 1453750 | rs28363151 | A/ G               | A         | 1  | 0.03         | intron(dbSNP)            | 0     |
| 1453845 | rs28363150 | T/ C               | T         | 1  | 0.01         | intron(dbSNP)            | 0     |
| 1453931 | rs28363149 | TCTACACCAGCCCTG/ - | ACACCAGCC | 12 | 0.22         | intron(dbSNP)            | 0     |
| 1454140 | rs28363148 | A/ G               | A         | 1  | 0.01         | intron(dbSNP)            | 0     |
| 1454177 | rs28363147 | A/ C               | A         | 1  | 0.01         | intron(dbSNP)            | 0.005 |
| 1454314 | rs28363146 | T/ C               | T         | 1  | 0.01         | intron(dbSNP)            | 0.002 |
| 1454371 | rs28363145 | C/ T               | C         | 1  | 0.01         | intron(dbSNP)            | 0     |
| 1454380 | rs28363144 | T/ C               | T         | 1  | 0.01         | intron(dbSNP)            | 0     |
| 1454432 | rs28363143 | T/ C               | T         | 1  | 0.01         | intron(dbSNP)            | 0     |
| 1454483 | rs28363142 | A/ G               | A         | 1  | 0.02         | intron(dbSNP)            | 0     |
| 1454576 | rs28363141 | C/ T               | C         | 3  | 0.05         | intron(dbSNP)            | 0     |
| 1454580 | rs11133767 | T/ C               | T         | 35 | 0.46         | intron(dbSNP)            | 0     |
| 1454763 | rs28363140 | T/ C               | T         | 1  | 0.01         | intron(dbSNP)            | 0.001 |
| 1454828 | rs28363139 | -/ GCGCTGG         | -         | 1  | 0.02         | intron(dbSNP)            | 0     |
| 1455405 | rs28363138 | C/ G               | C         | 2  | 0.05         | intron(dbSNP)            | 0     |
| 1455548 | rs28363137 | T/ C               | T         | 1  | 0.01         | intron(dbSNP)            | 0.003 |
| 1455560 | rs28363136 | T/ G               | T         | 1  | 0.01         | intron(dbSNP)            | 0     |
| 1455630 | rs28363135 | A/ G               | A         | 1  | 0.01         | intron(dbSNP)            | 0     |
| 1455671 | rs28363134 | C/ G               | C         | 1  | 0.01         | intron(dbSNP)            | 0     |
| 1455757 | rs28363133 | C/ G               | C         | 1  | 0.02         | intron(dbSNP)            | 0.002 |
| 1455884 | rs28363132 | T/ C               | T         | 1  | 0.01         | intron(dbSNP)            | 0     |
| 1455971 | rs28363131 | C/ T               | C         | 1  | 0.01         | intron(dbSNP)            | 0     |
| 1456024 | rs28363130 | C/ T               | C         | 1  | 0.01         | intron(dbSNP)            | 0     |
| 1456073 | rs6349     | A/ G               | A         | 5  | 0.09         | coding-synonymous(dbSNP) | 0.968 |
| 1456244 | rs28363129 | A/ G               | A         | 1  | 0.02         | intron(dbSNP)            | 0     |
| 1456615 | rs28363128 | G/ A               | G         | 1  | 0.02         | intron(dbSNP)            | 0     |
| 1457216 | rs28363127 | G/ T               | G         | 1  | 0.01         | intron(dbSNP)            | 0.227 |

|         |            |            |   |    |      |                              |       |
|---------|------------|------------|---|----|------|------------------------------|-------|
| 1457256 | rs28363126 | A/ G       | A | 2  | 0.03 | intron(dbSNP)                | 0     |
| 1457291 | rs28363125 | T/ C       | T | 1  | 0.02 | intron(dbSNP)                | 0     |
| 1457466 | rs11564768 | G/ A       | G | 1  | 0.01 | intron(dbSNP)                | 0     |
| 1457486 | rs28363124 | A/ G       | A | 2  | 0.03 | intron(dbSNP)                | 0     |
| 1457548 | rs6869645  | T/ C       | T | 10 | 0.17 | intron(dbSNP)                | 0     |
| 1457704 | rs11564767 | T/ A       | T | 19 | 0.3  | intron(dbSNP)                | 0     |
| 1457726 | rs11564766 | T/ C       | T | 3  | 0.05 | intron(dbSNP)                | 0     |
| 1457813 | rs28363123 | A/ G       | A | 1  | 0.01 | intron(dbSNP)                | 0     |
| 1457922 | rs11564765 | C/ T       | C | 3  | 0.05 | intron(dbSNP)                | 0.001 |
| 1458146 | rs28363122 | A/ G       | A | 1  | 0.01 | intron(dbSNP)                | 0     |
| 1458473 | rs28363121 | T/ G       | T | 1  | 0.01 | intron(dbSNP)                | 0     |
| 1458490 | rs28363120 | T/ C       | T | 14 | 0.24 | intron(dbSNP)                | 0     |
| 1458694 | rs28363119 | C/ T       | C | 8  | 0.14 | intron(dbSNP)                | 0     |
| 1458723 | rs11133768 | C/ T       | C | 11 | 0.19 | intron(dbSNP)                | 0     |
| 1458725 | rs28363118 | G/ A       | G | 1  | 0.01 | intron(dbSNP)                | 0     |
| 1458737 | rs28363117 | A/ G       | A | 3  | 0.06 | intron(dbSNP)                | 0     |
| 1458781 | rs28363116 | T/ C       | T | 1  | 0.02 | intron(dbSNP)                | 0     |
| 1458806 | rs11564764 | T/ C       | T | 3  | 0.07 | intron(dbSNP)                | 0     |
| 1458882 | rs28363115 | T/ C       | T | 11 | 0.2  | intron(dbSNP)                | 0     |
| 1458964 | rs28363114 | -/ CTTCGAC | - | 3  | 0.05 | intron(dbSNP)                | 0     |
| 1459036 | rs6876225  | A/ C       | A | 10 | 0.17 | intron(dbSNP)                | 0     |
| 1459375 | rs6880875  | T/ C       | T | 8  | 0.16 | coding-<br>synonymous(dbSNP) | 1     |
| 1460104 | rs3776513  | T/ G       | T | 12 | 0.22 | intron(dbSNP)                | 0     |
| 1460116 | rs3776512  | A/ G       | A | 11 | 0.2  | intron(dbSNP)                | 0     |
| 1460129 | rs3776511  | T/ C       | T | 12 | 0.21 | intron(dbSNP)                | 0     |
| 1460151 | rs28363113 | G/ C       | G | 1  | 0.02 | intron(dbSNP)                | 0.002 |
| 1460379 | rs10072058 | G/ A       | G | 10 | 0.18 | intron(dbSNP)                | 0.001 |
| 1460419 | rs28363112 | T/ C       | T | 1  | 0.01 | intron(dbSNP)                | 0.002 |
| 1460491 | rs28363111 | -/ A       | - | 16 | 0.27 | intron(dbSNP)                | 0     |
| 1460634 | rs28363110 | A/ G       | A | 1  | 0.01 | intron(dbSNP)                | 0     |
| 1461897 | rs28363109 | T/ C       | T | 1  | 0.02 | intron(dbSNP)                | 0     |
| 1461979 | rs11133770 | C/ A       | C | 19 | 0.3  | intron(dbSNP)                | 0     |
| 1462127 | rs429699   | T/ C       | T | 2  | 0.04 | intron(dbSNP)                | 0     |
| 1462169 | rs8179034  | A/ G       | A | 1  | 0.01 | coding-<br>synonymous(dbSNP) | 0.998 |

|         |            |      |   |    |      |                              |       |
|---------|------------|------|---|----|------|------------------------------|-------|
| 1462226 | rs8179035  | C/ G | C | 1  | 0.01 | coding-<br>synonymous(dbSNP) | 1     |
| 1462528 | rs28363108 | T/ C | T | 1  | 0.01 | intron(dbSNP)                | 0     |
| 1462693 | rs28363107 | A/ G | A | 1  | 0.01 | intron(dbSNP)                | 0     |
| 1462741 | rs28363106 | A/ G | A | 2  | 0.05 | intron(dbSNP)                | 0     |
| 1462836 | rs2270912  | A/ G | A | 1  | 0.01 | coding-<br>synonymous(dbSNP) | 0.996 |
| 1462985 | rs8179029  | T/ C | T | 13 | 0.22 | intron(dbSNP)                | 0     |
| 1463020 | rs8179031  | C/ T | C | 2  | 0.04 | intron(dbSNP)                | 0     |
| 1463060 | rs28363105 | T/ G | T | 1  | 0.01 | intron(dbSNP)                | 0     |
| 1463073 | rs28363104 | G/ A | G | 2  | 0.04 | intron(dbSNP)                | 0     |
| 1463147 | rs28363103 | T/ C | T | 1  | 0.01 | intron(dbSNP)                | 0     |
| 1463392 | rs28363102 | A/ C | A | 1  | 0.01 | intron(dbSNP)                | 0     |
| 1463472 | rs2617577  | C/ T | C | 25 | 0.38 | intron(dbSNP)                | 0     |
| 1463495 | rs28363101 | T/ C | T | 3  | 0.05 | intron(dbSNP)                | 0     |
| 1463571 | rs28363100 | T/ C | T | 1  | 0.01 | intron(dbSNP)                | 0     |
| 1463613 | rs11564762 | T/ G | T | 14 | 0.24 | intron(dbSNP)                | 0     |
| 1463948 | rs28363099 | C/ T | C | 1  | 0.03 | intron(dbSNP)                | 0     |
| 1463979 | rs28363098 | A/ G | A | 2  | 0.04 | intron(dbSNP)                | 0     |
| 1464025 | rs28363097 | A/ G | A | 1  | 0.01 | intron(dbSNP)                | 0     |
| 1464256 | rs2550936  | C/ A | C | 37 | 0.46 | intron(dbSNP)                | 0     |
| 1464412 | rs6347     | C/ T | C | 38 | 0.47 | coding-<br>synonymous(dbSNP) | 0.001 |
| 1465251 | rs27047    | C/ T | C | 45 | 0.5  | intron(dbSNP)                | 0     |
| 1465343 | rs28363096 | A/ G | A | 1  | 0.01 | intron(dbSNP)                | 0     |
| 1465361 | rs28363095 | A/ G | A | 1  | 0.01 | intron(dbSNP)                | 0     |
| 1465618 | rs28363094 | T/ G | T | 1  | 0.01 | intron(dbSNP)                | 0     |
| 1465645 | rs27048    | T/ C | T | 35 | 0.45 | intron(dbSNP)                | 0     |
| 1465664 | rs28363093 | T/ C | T | 1  | 0.01 | intron(dbSNP)                | 0     |
| 1465787 | rs28363092 | C/ G | C | 1  | 0.02 | intron(dbSNP)                | 0     |
| 1465793 | rs28363091 | G/ A | G | 1  | 0.01 | intron(dbSNP)                | 0.001 |
| 1465827 | rs11564761 | C/ - | C | 1  | 0.01 | intron(dbSNP)                | 0.001 |
| 1465848 | rs28363090 | A/ G | A | 1  | 0.02 | intron(dbSNP)                | 0     |
| 1465950 | rs10052985 | G/ A | G | 7  | 0.13 | intron(dbSNP)                | 0     |
| 1465971 | rs28363089 | A/ G | A | 2  | 0.04 | intron(dbSNP)                | 0     |
| 1465983 | rs28363088 | T/ C | T | 1  | 0.01 | intron(dbSNP)                | 0     |

|         |            |      |   |    |      |                              |       |
|---------|------------|------|---|----|------|------------------------------|-------|
| 1466130 | rs28363087 | T/ C | T | 1  | 0.01 | intron(dbSNP)                | 0     |
| 1466378 | rs28363086 | C/ T | C | 1  | 0.02 | intron(dbSNP)                | 0     |
| 1466567 | rs28363085 | A/ G | A | 1  | 0.02 | intron(dbSNP)                | 0     |
| 1466633 | rs28363084 | G/ A | G | 1  | 0.01 | intron(dbSNP)                | 0     |
| 1466756 | rs28363083 | G/ A | G | 1  | 0.02 | intron(dbSNP)                | 0     |
| 1466777 | rs28363082 | G/ A | G | 1  | 0.02 | intron(dbSNP)                | 0     |
| 1466787 | rs28363081 | G/ C | G | 1  | 0.01 | intron(dbSNP)                | 0     |
| 1466799 | rs28363080 | A/ G | A | 2  | 0.03 | intron(dbSNP)                | 0     |
| 1466903 | rs28363079 | A/ G | A | 1  | 0.02 | intron(dbSNP)                | 0     |
| 1466953 | rs28363078 | T/ C | T | 2  | 0.04 | intron(dbSNP)                | 0     |
| 1466991 | rs28363077 | T/ C | T | 1  | 0.02 | intron(dbSNP)                | 0     |
| 1467091 | rs28363076 | A/ G | A | 2  | 0.04 | intron(dbSNP)                | 0.001 |
| 1467160 | rs28363075 | T/ C | T | 1  | 0.01 | intron(dbSNP)                | 0     |
| 1467751 | rs28363074 | C/ G | C | 1  | 0.02 | intron(dbSNP)                | 0.001 |
| 1467756 | rs28363073 | T/ C | T | 1  | 0.01 | intron(dbSNP)                | 0     |
| 1467773 | rs2963253  | A/ G | A | 4  | 0.08 | intron(dbSNP)                | 0.002 |
| 1467876 | rs28363072 | A/ G | A | 1  | 0.02 | coding-<br>synonymous(dbSNP) | 1     |
| 1467951 | rs28363071 | A/ G | A | 1  | 0.01 | intron(dbSNP)                | 0     |
| 1468068 | rs28363070 | A/ G | A | 1  | 0.01 | intron(dbSNP)                | 0     |
| 1468190 | rs28363069 | A/ G | A | 1  | 0.01 | intron(dbSNP)                | 0     |
| 1468192 | rs28363068 | A/ G | A | 1  | 0.01 | intron(dbSNP)                | 0     |
| 1468257 | rs28382258 | A/ G | A | 1  | 0.01 | intron(dbSNP)                | 0     |
| 1468291 | rs11564759 | A/ G | A | 25 | 0.37 | intron(dbSNP)                | 0     |
| 1468340 | rs28382257 | A/ G | A | 1  | 0.02 | intron(dbSNP)                | 0     |
| 1468351 | rs28382256 | A/ G | A | 1  | 0.01 | intron(dbSNP)                | 0     |
| 1468361 | rs28382255 | T/ G | T | 1  | 0.01 | intron(dbSNP)                | 0     |
| 1468404 | rs466630   | G/ C | G | 40 | 0.48 | intron(dbSNP)                | 0     |
| 1468405 | rs456645   | G/ A | G | 36 | 0.46 | intron(dbSNP)                | 0     |
| 1468629 | rs37022    | T/ A | T | 34 | 0.45 | intron(dbSNP)                | 0     |
| 1468668 | rs28382254 | G/ T | G | 1  | 0.02 | intron(dbSNP)                | 0.151 |
| 1469044 | rs28382253 | A/ G | A | 1  | 0.01 | intron(dbSNP)                | 0     |
| 1469142 | rs40358    | A/ C | A | 46 | 0.5  | intron(dbSNP)                | 0     |
| 1469646 | rs2042449  | A/ G | A | 18 | 0.3  | intron(dbSNP)                | 0     |
| 1469894 | rs28382252 | G/ A | G | 1  | 0.02 | intron(dbSNP)                | 0     |
| 1469898 | rs28382251 | C/ G | C | 1  | 0.02 | intron(dbSNP)                | 0     |

|         |            |      |   |    |      |                              |       |
|---------|------------|------|---|----|------|------------------------------|-------|
| 1469984 | rs28382250 | A/ G | A | 1  | 0.01 | intron(dbSNP)                | 0     |
| 1470047 | rs2963252  | T/ C | T | 3  | 0.06 | intron(dbSNP)                | 0     |
| 1470212 | rs13161905 | T/ C | T | 16 | 0.27 | intron(dbSNP)                | 0     |
| 1470652 | rs2975293  | T/ C | T | 4  | 0.07 | intron(dbSNP)                | 0     |
| 1471374 | rs37020    | A/ C | A | 37 | 0.47 | intron(dbSNP)                | 0.001 |
| 1471558 | rs10040882 | T/ C | T | 19 | 0.31 | intron(dbSNP)                | 0     |
| 1472745 | rs2927677  | C/ T | C | 1  | 0.03 | intron(dbSNP)                | 0     |
| 1472932 | rs2975292  | G/ C | G | 43 | 0.49 | intron(dbSNP)                | 0.002 |
| 1473228 | rs28382249 | C/ T | C | 1  | 0.01 | intron(dbSNP)                | 0     |
| 1473268 | rs2735917  | A/ C | A | 6  | 0.11 | intron(dbSNP)                | 0     |
| 1473306 | rs28382248 | A/ G | A | 24 | 0.37 | intron(dbSNP)                | 0     |
| 1473346 | rs28382247 | T/ G | T | 21 | 0.33 | intron(dbSNP)                | 0.001 |
| 1473382 | rs28382246 | A/ T | A | 24 | 0.36 | intron(dbSNP)                | 0     |
| 1473476 | rs28382245 | T/ C | T | 25 | 0.37 | intron(dbSNP)                | 0     |
| 1473588 | rs11564758 | G/ C | G | 18 | 0.29 | intron(dbSNP)                | 0.004 |
| 1473801 | rs6348     | A/ G | A | 10 | 0.18 | coding-<br>synonymous(dbSNP) | 1     |
| 1474184 | rs2975291  | T/ G | T | 1  | 0.02 | intron(dbSNP)                | 0.009 |
| 1474197 | rs28382244 | -/ G | - | 2  | 0.03 | intron(dbSNP)                | 0     |
| 1474228 | rs28382243 | T/ C | T | 1  | 0.01 | intron(dbSNP)                | 0.004 |
| 1474543 | rs11133778 | G/ C | G | 24 | 0.36 | intron(dbSNP)                | 0.001 |
| 1474562 | rs28382242 | C/ T | C | 1  | 0.02 | intron(dbSNP)                | 0.021 |
| 1474709 | rs28382241 | C/ G | C | 1  | 0.01 | intron(dbSNP)                | 0     |
| 1474732 | rs2975289  | T/ C | T | 1  | 0.01 | intron(dbSNP)                | 0     |
| 1474907 | rs28382240 | T/ C | T | 1  | 0.01 | intron(dbSNP)                | 0.001 |
| 1476905 | rs464049   | A/ G | A | 38 | 0.47 | intron(dbSNP)                | 0     |
| 1478159 | rs250686   | T/ C | T | 42 | 0.49 | intron(dbSNP)                | 0     |
| 1480803 | rs250682   | C/ G | C | 43 | 0.49 | intron(dbSNP)                | 0     |
| 1481011 | rs250681   | C/ T | C | 37 | 0.47 | intron(dbSNP)                | 0.001 |
| 1481111 | rs10052016 | G/ A | G | 18 | 0.29 | intron(dbSNP)                | 0.002 |
| 1481135 | rs10053602 | C/ T | C | 18 | 0.29 | intron(dbSNP)                | 0.003 |
| 1481514 | rs393795   | T/ G | T | 37 | 0.47 | intron(dbSNP)                | 0     |
| 1482969 | rs460700   | C/ T | C | 34 | 0.45 | intron(dbSNP)                | 0     |
| 1483093 | rs458334   | A/ G | A | 38 | 0.47 | intron(dbSNP)                | 0     |
| 1483244 | rs464061   | A/ G | A | 38 | 0.47 | intron(dbSNP)                | 0.001 |
| 1483515 | rs456082   | G/ A | G | 38 | 0.47 | intron(dbSNP)                | 0     |

|         |            |                                |   |    |      |               |       |
|---------|------------|--------------------------------|---|----|------|---------------|-------|
| 1483616 | rs11737901 | T/ C                           | T | 16 | 0.27 | intron(dbSNP) | 0.001 |
| 1483662 | rs28382239 | C/ T                           | C | 1  | 0.01 | intron(dbSNP) | 0     |
| 1483775 | rs410209   | G/ A                           | G | 33 | 0.44 | intron(dbSNP) | 0     |
| 1483834 | rs409588   | T/ G                           | T | 38 | 0.47 | intron(dbSNP) | 0     |
| 1483912 | rs3834250  | -/<br>TCACCTCCCGCCTGGCTGTTCCCT | - | 3  | 0.06 | intron(dbSNP) | 0.003 |
| 1483933 | rs458860   | A/ T                           | A | 38 | 0.47 | intron(dbSNP) | 0.005 |
| 1484123 | rs464528   | T/ C                           | T | 40 | 0.48 | intron(dbSNP) | 0.002 |
| 1484164 | rs463379   | C/ G                           | C | 42 | 0.49 | intron(dbSNP) | 0     |
| 1484186 | rs3056480  | -/ CTC                         | - | 8  | 0.15 | intron(dbSNP) | 0     |
| 1484214 | rs461753   | T/ C                           | T | 37 | 0.47 | intron(dbSNP) | 0     |
| 1484302 | rs458632   | G/ A                           | G | 31 | 0.43 | intron(dbSNP) | 0     |
| 1484306 | rs460934   | G/ A                           | G | 1  | 0.02 | intron(dbSNP) | 0     |
| 1484554 | rs462053   | C/ T                           | C | 34 | 0.45 | intron(dbSNP) | 0     |
| 1484622 | rs457894   | C/ T                           | C | 34 | 0.45 | intron(dbSNP) | 0     |
| 1484853 | rs460007   | A/ G                           | A | 31 | 0.43 | intron(dbSNP) | 0     |
| 1484992 | rs461677   | C/ A                           | C | 32 | 0.43 | intron(dbSNP) | 0.005 |
| 1485042 | rs459141   | T/ C                           | T | 32 | 0.43 | intron(dbSNP) | 0     |
| 1485164 | rs28382237 | A/ G                           | A | 1  | 0.02 | intron(dbSNP) | 0     |
| 1485202 | rs456774   | C/ G                           | C | 38 | 0.47 | intron(dbSNP) | 0     |
| 1485490 | rs28382236 | T/ C                           | T | 1  | 0.01 | intron(dbSNP) | 0.001 |
| 1485552 | rs2975284  | A/ G                           | A | 4  | 0.08 | intron(dbSNP) | 0     |
| 1485566 | rs16878300 | A/ G                           | A | 2  | 0.03 | intron(dbSNP) | 0     |
| 1485825 | rs460000   | T/ G                           | T | 38 | 0.47 | intron(dbSNP) | NA    |
| 1485876 | rs465130   | A/ G                           | A | 33 | 0.44 | intron(dbSNP) | 0.002 |
| 1485881 | rs465989   | T/ C                           | T | 31 | 0.43 | intron(dbSNP) | 0     |
| 1485922 | rs28382235 | C/ A                           | C | 1  | 0.01 | intron(dbSNP) | 0     |
| 1485966 | rs3842031  | G/ -                           | G | 33 | 0.44 | intron(dbSNP) | 0.001 |
| 1486073 | rs28382234 | C/ T                           | C | 2  | 0.04 | intron(dbSNP) | 0.004 |
| 1486401 | rs4975646  | A/ G                           | A | 13 | 0.22 | intron(dbSNP) | 0     |
| 1487075 | rs410481   | T/ C                           | T | 1  | 0.02 | intron(dbSNP) | 0.002 |
| 1489408 | rs420422   | T/ C                           | T | 42 | 0.49 | intron(dbSNP) | 0.003 |
| 1490726 | rs2963242  | T/ C                           | T | 6  | 0.12 | intron(dbSNP) | 0     |
| 1491105 | rs1048955  | C/ T                           | C | 3  | 0.06 | intron(dbSNP) | 0     |
| 1491174 | rs1048953  | G/ A                           | G | 13 | 0.22 | intron(dbSNP) | 0     |
| 1491354 | rs403636   | A/ C                           | A | 21 | 0.33 | intron(dbSNP) | 0     |
| 1493280 | rs246997   | T/ G                           | T | 19 | 0.31 | intron(dbSNP) | 0.022 |

|         |            |                       |   |    |      |                              |       |
|---------|------------|-----------------------|---|----|------|------------------------------|-------|
| 1493504 | rs28382233 | A/ G                  | A | 1  | 0.01 | intron(dbSNP)                | 0.029 |
| 1493506 | rs2963239  | G/ A                  | G | 4  | 0.07 | intron(dbSNP)                | 0.029 |
| 1493596 | rs28382232 | T/ G                  | T | 1  | 0.01 | intron(dbSNP)                | 0     |
| 1493599 | rs29001606 | -/ AATAGATGATTGACAGAT | - | 1  | 0.01 | intron(dbSNP)                | 0     |
| 1493620 | rs28742609 | -/ AATA               | - | 1  | 0.01 | intron(dbSNP)                | 0.001 |
| 1493681 | rs2927676  | G/ C                  | G | 21 | 0.33 | intron(dbSNP)                | 0.001 |
| 1493728 | rs2927675  | A/ G                  | A | 3  | 0.06 | intron(dbSNP)                | 0.01  |
| 1493934 | rs28742608 | G/ T                  | G | 5  | 0.1  | intron(dbSNP)                | 0     |
| 1494162 | rs28382231 | G/ A                  | G | 1  | 0.01 | intron(dbSNP)                | 0.001 |
| 1494261 | rs28382230 | A/ C                  | A | 1  | 0.02 | intron(dbSNP)                | 0     |
| 1494281 | rs28382229 | G/ A                  | G | 1  | 0.01 | intron(dbSNP)                | 0     |
| 1494306 | rs28382228 | T/ C                  | T | 3  | 0.05 | intron(dbSNP)                | 0.012 |
| 1494436 | rs2911492  | A/ G                  | A | 2  | 0.05 | intron(dbSNP)                | 0     |
| 1494711 | rs28382227 | T/ C                  | T | 1  | 0.01 | intron(dbSNP)                | 0     |
| 1494951 | rs28382226 | T/ C                  | T | 1  | 0.02 | intron(dbSNP)                | 0     |
| 1494997 | rs28382225 | G/ C                  | G | 1  | 0.01 | intron(dbSNP)                | 0     |
| 1495521 | rs2617605  | C/ T                  | C | 27 | 0.39 | intron(dbSNP)                | 0     |
| 1495552 | rs28382224 | T/ C                  | T | 1  | 0.01 | intron(dbSNP)                | 0     |
| 1495654 | rs28382223 | C/ G                  | C | 1  | 0.01 | intron(dbSNP)                | 0.004 |
| 1495676 | rs28382222 | A/ G                  | A | 2  | 0.04 | intron(dbSNP)                | 0     |
| 1495732 | rs2981359  | C/ G                  | C | 49 | 0.5  | intron(dbSNP)                | 0.001 |
| 1495757 | rs28382221 | T/ C                  | T | 7  | 0.14 | intron(dbSNP)                | 0     |
| 1495842 | rs13189021 | T/ C                  | T | 8  | 0.15 | intron(dbSNP)                | 0     |
| 1495974 | rs2254408  | A/ C                  | A | 39 | 0.48 | intron(dbSNP)                | 0.001 |
| 1495979 | rs2270914  | T/ C                  | T | 19 | 0.31 | intron(dbSNP)                | 0     |
| 1495987 | rs2270913  | A/ G                  | A | 6  | 0.11 | intron(dbSNP)                | 0     |
| 1496007 | rs8179023  | C/ G                  | C | 16 | 0.26 | intron(dbSNP)                | 0     |
| 1496151 | rs6351     | A/ G                  | A | 1  | 0.01 | coding-<br>synonymous(dbSNP) | 0     |
| 1496163 | rs6346     | A/ C                  | A | 4  | 0.08 | coding-<br>synonymous(dbSNP) | 0     |
| 1496199 | rs6350     | A/ G                  | A | 6  | 0.12 | coding-<br>synonymous(dbSNP) | 0.99  |
| 1496498 | rs2455391  | A/ G                  | A | 22 | 0.34 | intron(dbSNP)                | 0     |



|         |            |      |   |    |      |               |       |
|---------|------------|------|---|----|------|---------------|-------|
| 1496603 | rs2975223  | C/ T | C | 45 | 0.49 | intron(dbSNP) | 0     |
| 1496604 | rs2937640  | T/ C | T | 45 | 0.5  | intron(dbSNP) | 0     |
| 1496607 | rs28382220 | T/ C | T | 1  | 0.01 | intron(dbSNP) | 0     |
| 1496728 | rs2937639  | C/ T | C | 44 | 0.49 | intron(dbSNP) | 0     |
| 1496762 | rs11564757 | T/ C | T | 6  | 0.11 | intron(dbSNP) | 0     |
| 1496763 | rs28382219 | C/ A | C | 1  | 0.01 | intron(dbSNP) | 0     |
| 1496990 | rs1316830  | T/ C | T | 39 | 0.47 | intron(dbSNP) | 0     |
| 1496998 | rs28382218 | A/ G | A | 1  | 0.02 | intron(dbSNP) | 0     |
| 1497218 | rs28382217 | A/ G | A | 1  | 0.01 | intron(dbSNP) | 0     |
| 1497261 | rs28382216 | A/ G | A | 1  | 0.01 | intron(dbSNP) | 0     |
| 1497427 | rs2963238  | G/ T | G | 47 | 0.5  | intron(dbSNP) | 0     |
| 1497581 | rs28382215 | G/ A | G | 1  | 0.01 | intron(dbSNP) | 0.002 |
| 1497817 | rs2911493  | T/ C | T | 2  | 0.05 | intron(dbSNP) | 0.001 |
| 1497970 | rs28382214 | T/ C | T | 1  | 0.01 | intron(dbSNP) | 0     |
| 1497985 | rs11564752 | A/ C | A | 5  | 0.09 | intron(dbSNP) | 0     |
| 1498379 | rs2735854  | T/ C | T | 2  | 0.04 | intron(dbSNP) | 0     |
