# Supplementary material for: Genomic Features of the Human Dopamine Transporter Gene and Its Potential Epigenetic States: Implications for Phenotypic Diversity
Source: PubMed Central journal article supplement (PMC2883569; doi:10.1371/journal.pone.0011067), 2010-06-10
Supplement: pone.0011067.s008.pdf [file pone.0011067.s008.pdf]

Table S 2 - Tandem repeats in the SLC6A3 (period more than 30 bp)

| <b>VARscore</b>    | <b>Start</b> | <b>End</b> | <b>Period</b> | <b>Exponent</b> | <b>Consensus length</b> | <b>% match</b> | <b>% indels</b> | <b>TRFscore</b> |
|--------------------|--------------|------------|---------------|-----------------|-------------------------|----------------|-----------------|-----------------|
| -0.028704114       | 951          | 1036       | 44            | 2               | 44                      | 90             | 0               | 144             |
| -1.034923948       | 966          | 1062       | 36            | 2.8             | 34                      | 73             | 11              | 105             |
| -0.474704592       | 7919         | 8066       | 32            | 4.7             | 31                      | 75             | 12              | 143             |
| <b>2.821961676</b> | 9296         | 9744       | 66            | 6.8             | 66                      | 95             | 1               | 841             |
| -1.833366673       | 9296         | 9744       | 195           | 2.3             | 197                     | 94             | 2               | 832             |
| <b>1.223656129</b> | 10224        | 10451      | 73            | 3.1             | 73                      | 89             | 0               | 360             |
| -1.050985237       | 11176        | 11233      | 30            | 1.9             | 30                      | 86             | 6               | 90              |
| <b>1.034533915</b> | 13637        | 14068      | 29            | 14.9            | 28                      | 75             | 10              | 365             |
| -0.114151967       | 13632        | 14068      | 87            | 5               | 85                      | 76             | 6               | 460             |
| <b>1.213043456</b> | 13632        | 14068      | 58            | 7.5             | 58                      | 78             | 3               | 469             |
| 4.127747106        | 22042        | 23072      | 38            | 27.7            | 38                      | 91             | 2               | 1612            |
| <b>2.432854578</b> | 22043        | 23072      | 74            | 13.8            | 75                      | 91             | 2               | 1595            |
| -1.537137083       | 22042        | 23072      | 112           | 9.2             | 112                     | 91             | 2               | 1634            |
| -1.132063425       | 23665        | 23760      | 29            | 3.3             | 29                      | 68             | 7               | 98              |
| -0.06599552        | 26056        | 26867      | 82            | 10              | 80                      | 66             | 19              | 338             |
| 0.839078649        | 28027        | 28310      | 54            | 5.2             | 54                      | 81             | 3               | 355             |
| -1.424298858       | 28014        | 28310      | 109           | 2.7             | 109                     | 83             | 1               | 437             |
| <b>2.393938188</b> | 28402        | 28929      | 55            | 9.6             | 55                      | 83             | 4               | 688             |
| 0.026211934        | 30906        | 31044      | 38            | 3.6             | 38                      | 91             | 0               | 222             |
| -0.139101424       | 30906        | 31068      | 38            | 4.2             | 38                      | 85             | 2               | 214             |
| 0.535117174        | 33502        | 33683      | 30            | 6.1             | 30                      | 98             | 0               | 350             |
| -0.748525789       | 41933        | 42048      | 40            | 2.7             | 44                      | 80             | 13              | 163             |
| 0.377474801        | 41872        | 42133      | 70            | 3.8             | 69                      | 75             | 8               | 256             |
| -0.116118952       | 41946        | 42138      | 40            | 5.1             | 39                      | 79             | 11              | 198             |
| <b>2.310554075</b> | 51439        | 51842      | 40            | 10              | 40                      | 92             | 3               | 679             |
| -1.833320753       | 51439        | 51842      | 165           | 2.5             | 160                     | 93             | 3               | 700             |
| -0.404375771       | 52326        | 52528      | 38            | 5               | 39                      | 75             | 16              | 246             |
| -0.2794409         | 52313        | 52522      | 44            | 5               | 43                      | 75             | 16              | 262             |
| 0.553927933        | 52313        | 52528      | 82            | 2.6             | 82                      | 94             | 1               | 378             |
