# Supplementary material for: Genomic Features of the Human Dopamine Transporter Gene and Its Potential Epigenetic States: Implications for Phenotypic Diversity
Source: PubMed Central journal article supplement (PMC2883569; doi:10.1371/journal.pone.0011067), 2010-06-10
Supplement: pone.0011067.s009.pdf [file pone.0011067.s009.pdf]

Table S3- tandem repeats in the SLC6A4

| <i>VARscore</i>     | <i>start</i> | <i>end</i> | <i>period</i> | <i>exponent</i> | <i>consensus</i> | <i>length</i> | <i>%match</i> | <i>%indels</i> | <i>TRFscore</i> |
|---------------------|--------------|------------|---------------|-----------------|------------------|---------------|---------------|----------------|-----------------|
| -1.018909256        | 5083         | 5114       | 17            | 1.9             | 17               | 87            | 6             | 52             | 31              |
| -0.92775213         | 5089         | 5137       | 23            | 2.1             | 23               | 78            | 14            | 60             | 32              |
| -0.87664277         | 5111         | 5158       | 14            | 3.5             | 14               | 71            | 18            | 46             | 39              |
| -1.03244375         | 5112         | 5175       | 28            | 2.2             | 31               | 75            | 16            | 80             | 39              |
| <b>-0.561456817</b> | 5196         | 5298       | <b>36</b>     | 2.8             | 36               | 88            | 5             | 152            | 45              |
| -1.917650942        | 5119         | 5421       | 2             | 150             | 2                | 59            | 10            | 95             | 39              |
| -0.191163122        | 5940         | 5967       | 5             | 5.6             | 5                | 86            | 0             | 42             | 14              |
| 1.210264534         | 6524         | 6674       | 3             | 50              | 3                | 87            | 1             | 176            | 0               |
| 1.049641397         | 9203         | 9234       | 2             | 16.5            | 2                | 87            | 6             | 52             | 56              |
| -0.839116377        | 9795         | 9824       | 10            | 2.9             | 11               | 85            | 14            | 50             | 0               |
| -0.832511234        | 9795         | 9824       | 11            | 2.8             | 12               | 85            | 14            | 45             | 0               |
| -1.034821736        | 9965         | 9998       | 14            | 2.7             | 13               | 73            | 17            | 44             | 17              |
| -1.083216714        | 14618        | 14644      | 14            | 1.9             | 14               | 100           | 0             | 54             | 22              |
| 0.934215772         | 15108        | 15313      | 17            | 12.4            | 16               | 87            | 7             | 314            | 7               |
| <b>0.357513953</b>  | 15108        | 15313      | <b>33</b>     | 6.2             | 32               | 90            | 5             | 314            | 7               |
| <b>1.357956456</b>  | 15108        | 15313      | <b>50</b>     | 4.1             | 50               | 90            | 3             | 332            | 7               |
| -1.136841735        | 18578        | 18597      | 10            | 2               | 10               | 100           | 0             | 40             | 30              |
| 0.970082361         | 19820        | 19863      | 4             | 11.5            | 4                | 95            | 4             | 78             | 79              |
| -1.160640731        | 20011        | 20035      | 13            | 1.9             | 13               | 91            | 0             | 43             | 84              |
| 0.827051746         | 20381        | 20446      | 5             | 13.2            | 5                | 77            | 16            | 82             | 0               |
| 1.042712779         | 21610        | 21765      | 4             | 38.8            | 4                | 81            | 11            | 201            | 68              |
| -0.744394463        | 22046        | 22081      | 9             | 3.4             | 10               | 82            | 17            | 46             | 86              |
| -0.80962617         | 22046        | 22081      | 14            | 2.6             | 14               | 82            | 4             | 46             | 86              |
| 0.382017668         | 22936        | 22963      | 4             | 7               | 4                | 100           | 0             | 56             | 75              |
| -1.072768062        | 27009        | 27035      | 11            | 2.3             | 12               | 93            | 6             | 49             | 44              |
| -0.743941181        | 27990        | 28026      | 10            | 3.8             | 10               | 75            | 7             | 48             | 75              |
| -0.19317793         | 28097        | 28120      | 5             | 4.8             | 5                | 100           | 0             | 48             | 0               |
| -0.553236874        | 28526        | 28590      | 20            | 3.2             | 20               | 84            | 0             | 102            | 20              |
| -1.133536242        | 28738        | 28762      | 13            | 2               | 13               | 92            | 7             | 45             | 8               |
| -0.588711622        | 30427        | 30463      | 11            | 3.5             | 11               | 85            | 14            | 57             | 0               |

|              |       |       |    |     |    |     |    |    |    |
|--------------|-------|-------|----|-----|----|-----|----|----|----|
| -0.909971739 | 30425 | 30463 | 18 | 2.1 | 19 | 85  | 4  | 59 | 0  |
| -1.045964301 | 30425 | 30463 | 20 | 1.9 | 20 | 89  | 0  | 64 | 0  |
| 0.501021163  | 30751 | 30782 | 4  | 8.2 | 4  | 93  | 6  | 59 | 78 |
| -0.568394706 | 30751 | 30790 | 12 | 3.5 | 11 | 89  | 6  | 59 | 75 |
| -0.08228808  | 31343 | 31363 | 4  | 5.2 | 4  | 100 | 0  | 42 | 0  |
| -0.988723652 | 31485 | 31518 | 16 | 2.3 | 16 | 76  | 14 | 46 | 47 |
| -0.804275721 | 36940 | 37005 | 19 | 3.2 | 19 | 73  | 22 | 83 | 25 |
